# Supplementary material for: Cannabidiol-Loaded Solid Lipid Nanoparticles Ameliorate the Inhibition of Proinflammatory Cytokines and Free Radicals in an In Vitro Inflammation-Induced Cell Model
Source: MDPI journal article supplement (doi:10.3390/ijms25094744), 2024-04-26
Supplement: s1 [file s1]

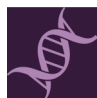

Article

# Cannabidiol-Loaded Solid Lipid Nanoparticles Ameliorate the Inhibition of Proinflammatory Cytokines and Free Radicals in an In Vitro Inflammation-Induced Cell Model

Khent Primo Alcantara, John Wilfred T. Malabanan, Nonthaneth Nalinratana, Worathat Thitikornpong, Pornchai Rojsitthisak and Pranee Rojsitthisak

## Supplementary information

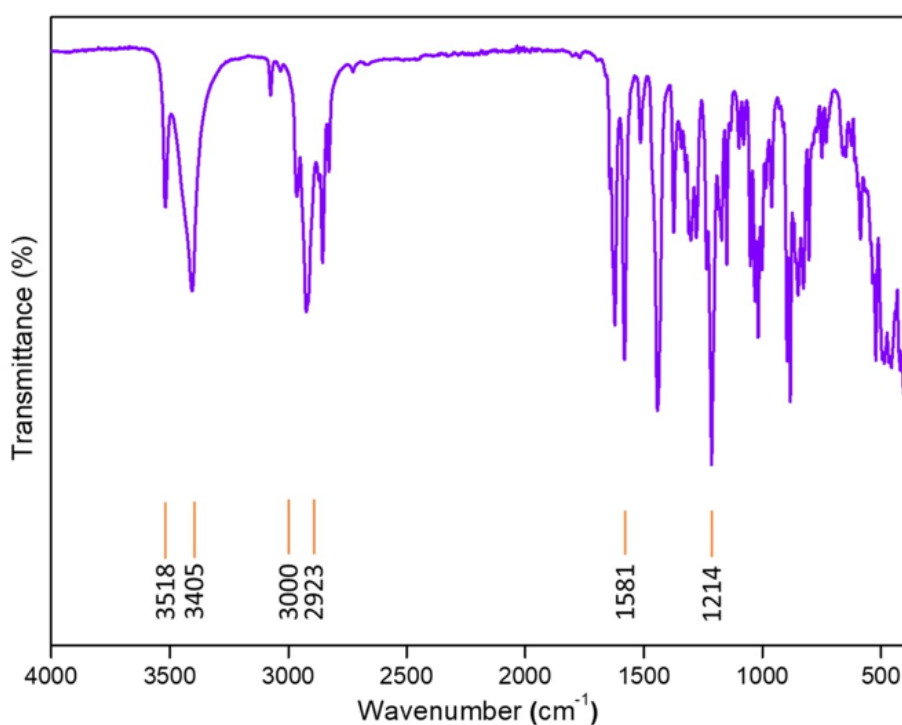

**Figure S1.** FT-IR spectrum of cannabidiol (CBD).

<sup>1</sup>H Cannabidiol (CBD) (CDCl<sub>3</sub>)

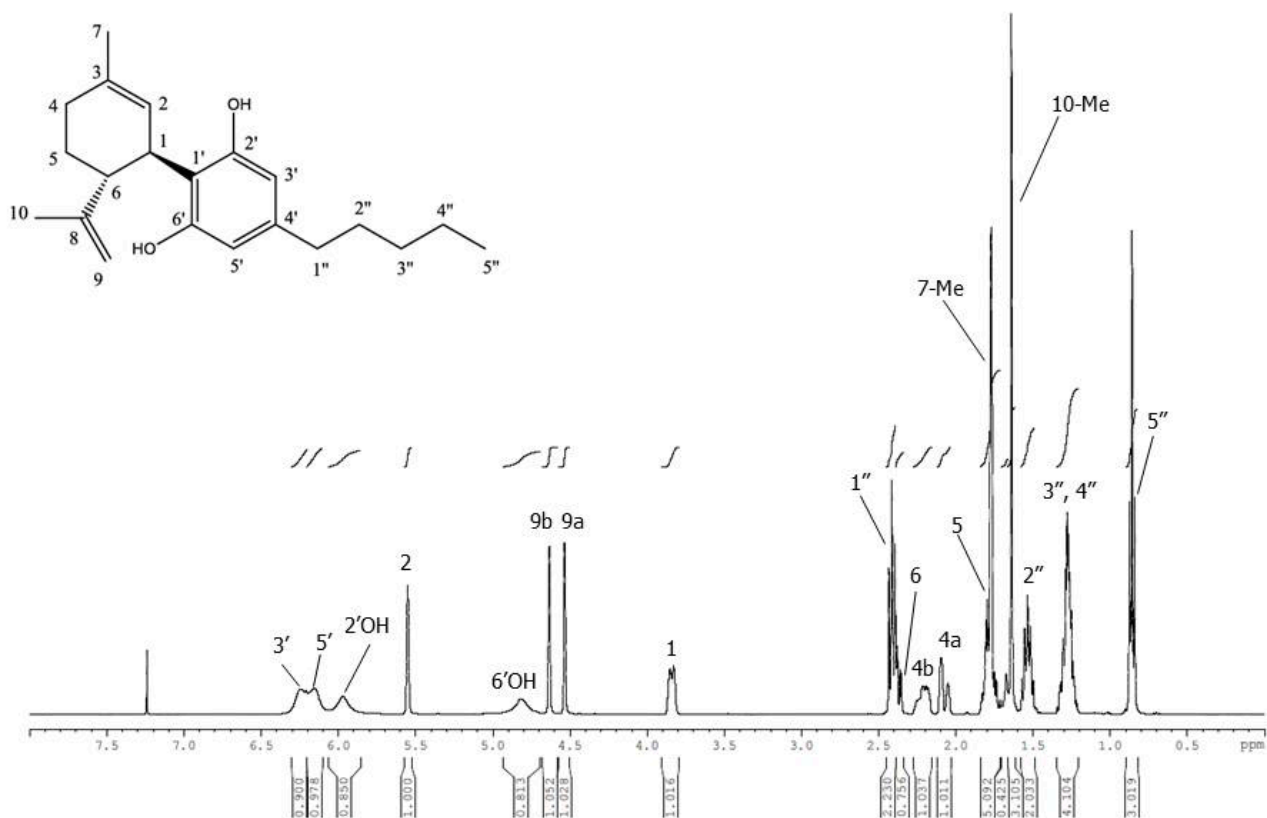

**Figure S2.** <sup>1</sup>H-NMR spectrum of cannabidiol (CBD).

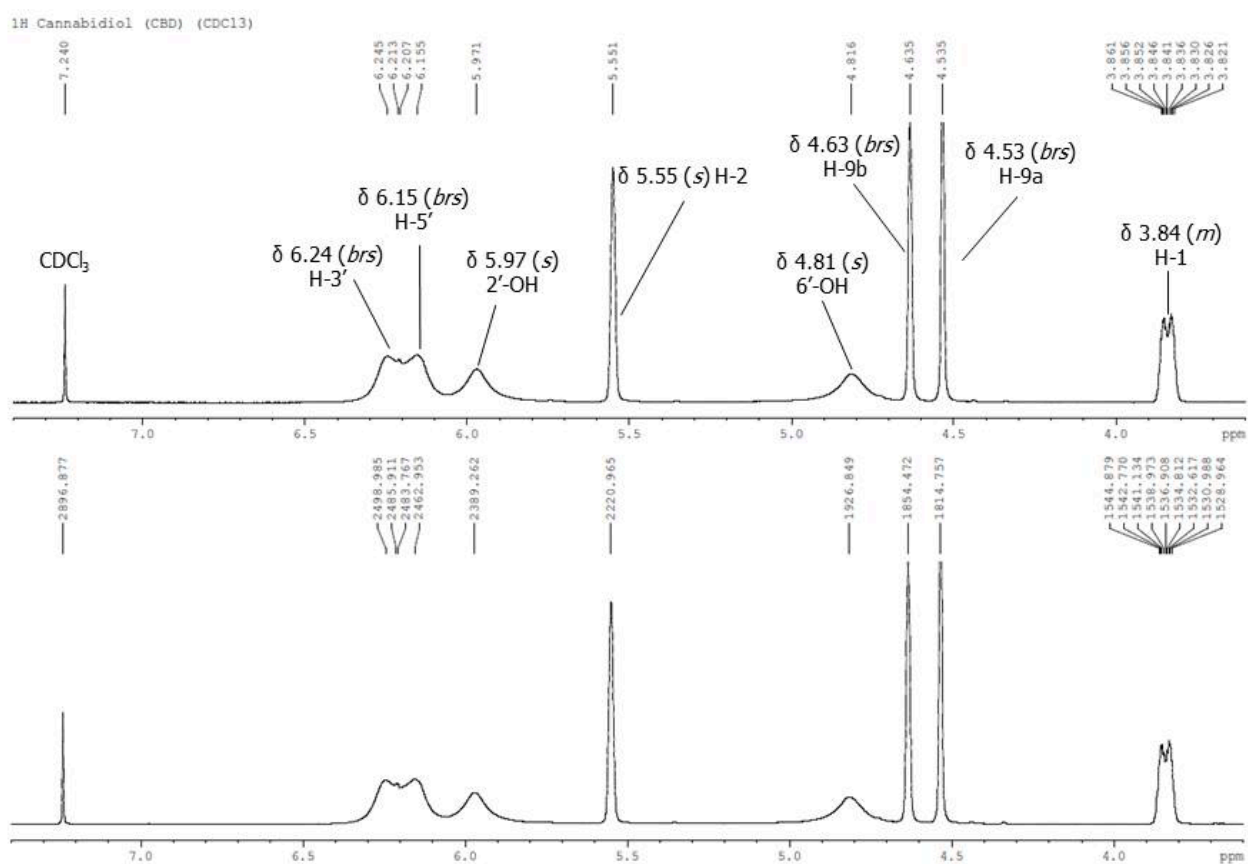

Figure S2. <sup>1</sup>H-NMR spectrum of cannabidiol (CBD) (cont.).

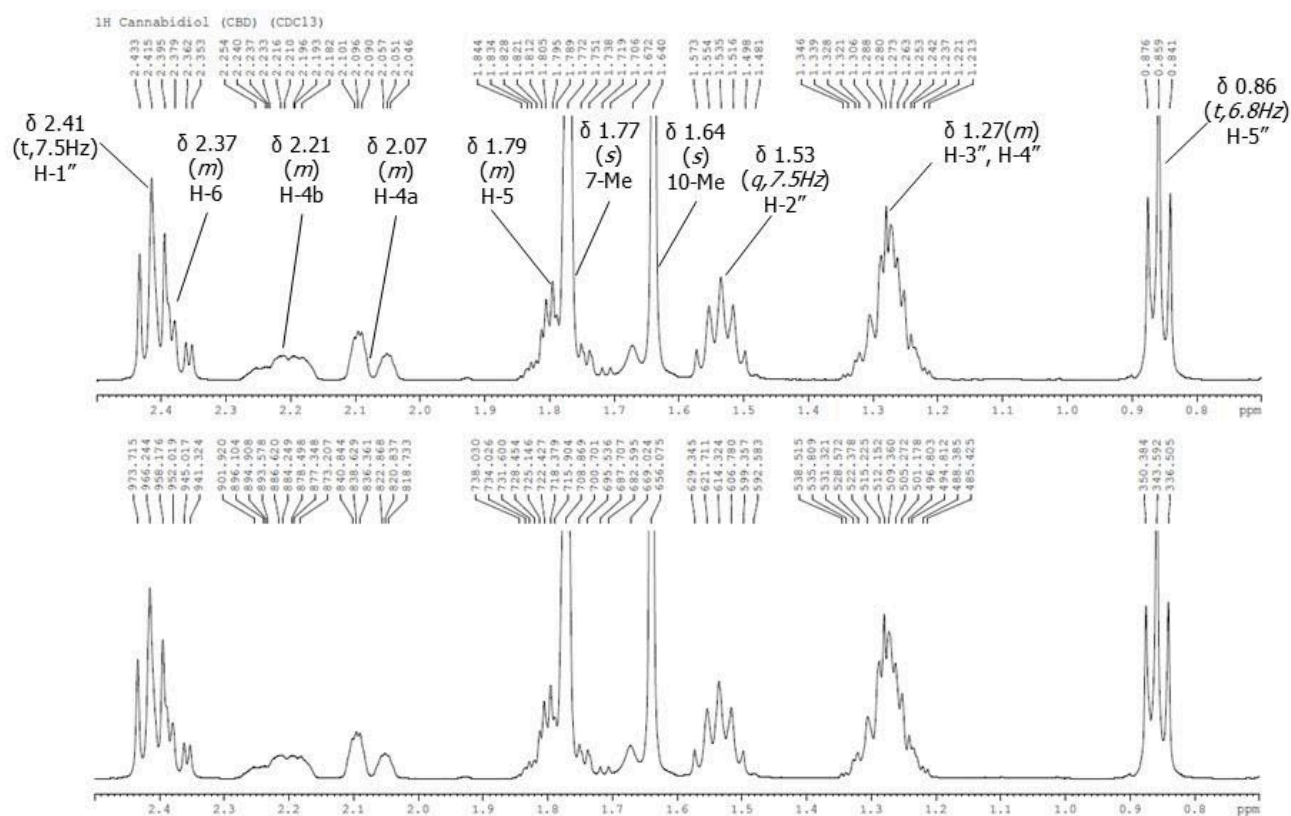

Figure S2. <sup>1</sup>H-NMR spectrum of cannabidiol (CBD) (cont.).

<sup>13</sup>C Cannabidiol (CBD) (CDCl<sub>3</sub>)

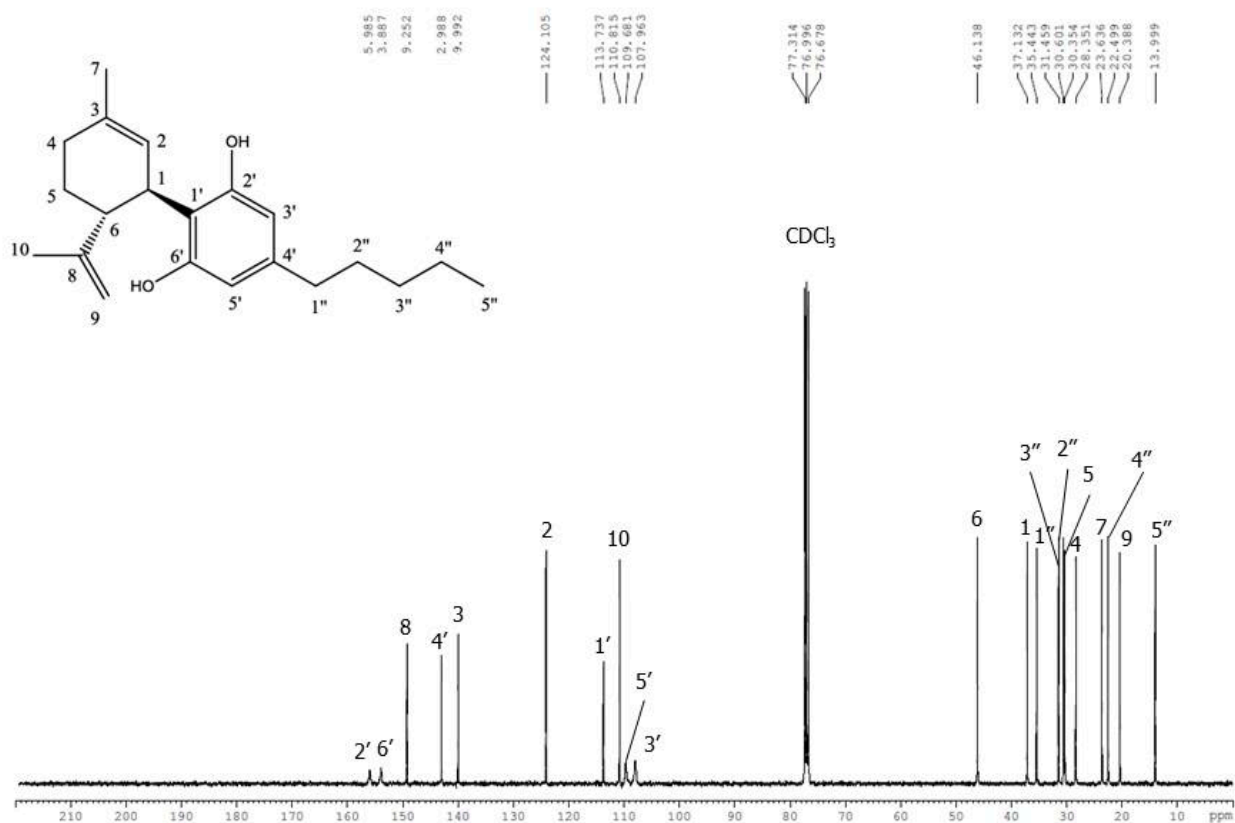

**Figure S3.** <sup>13</sup>C-NMR spectrum of cannabidiol (CBD).

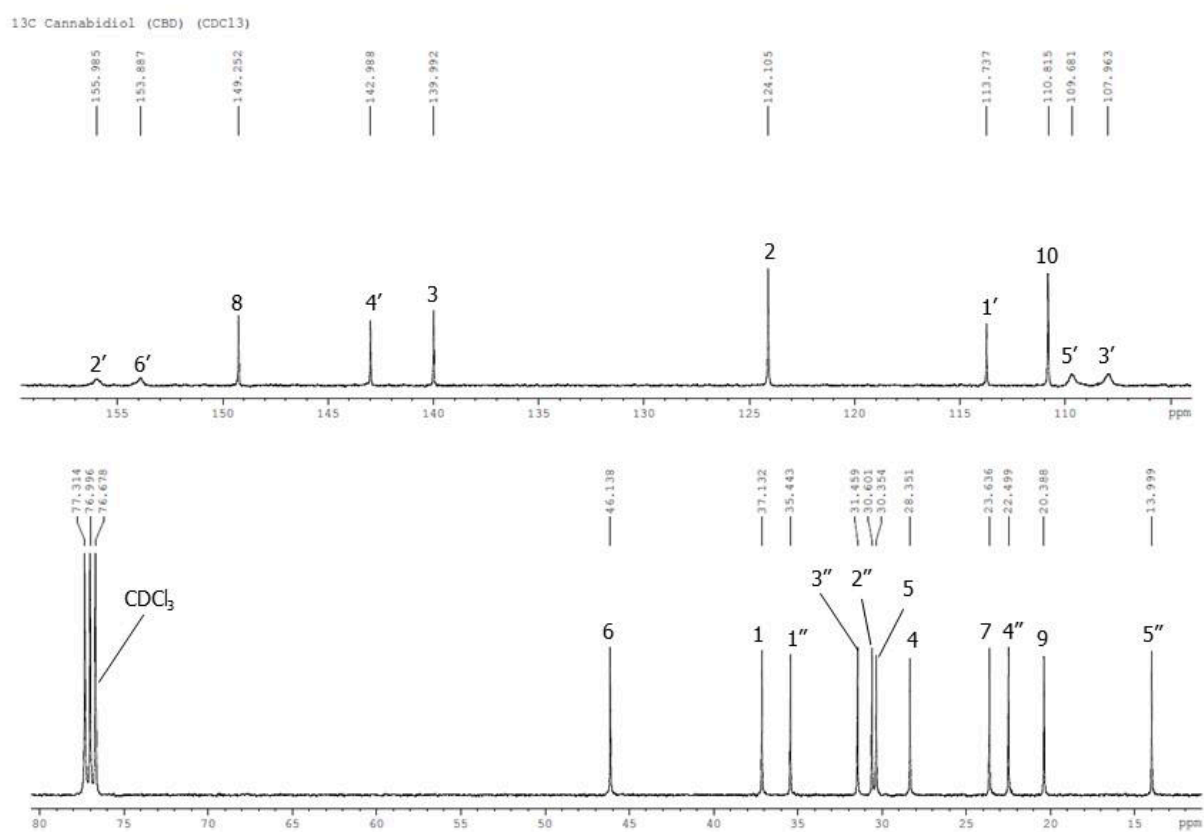

**Figure S3.** <sup>13</sup>C-NMR spectrum of cannabidiol (CBD) (cont.).

# Acquisition Parameter

|             |            |                      |          |                  |           |
|-------------|------------|----------------------|----------|------------------|-----------|
| Source Type | ESI        | Ion Polarity         | Positive | Set Nebulizer    | 2.0 Bar   |
| Focus       | Not active |                      |          | Set Dry Heater   | 200 °C    |
| Scan Begin  | 50 m/z     | Set Capillary        | 4500 V   | Set Dry Gas      | 8.0 l/min |
| Scan End    | 2000 m/z   | Set End Plate Offset | -500 V   | Set Divert Valve | Waste     |

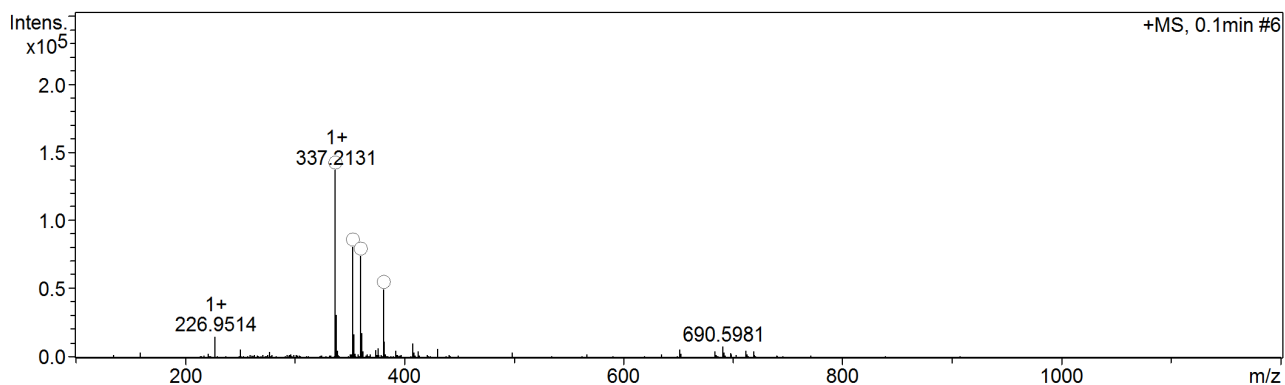

**Figure S4.** High-resolution mass spectrometry (HRMS) spectrum of cannabidiol (CBD).

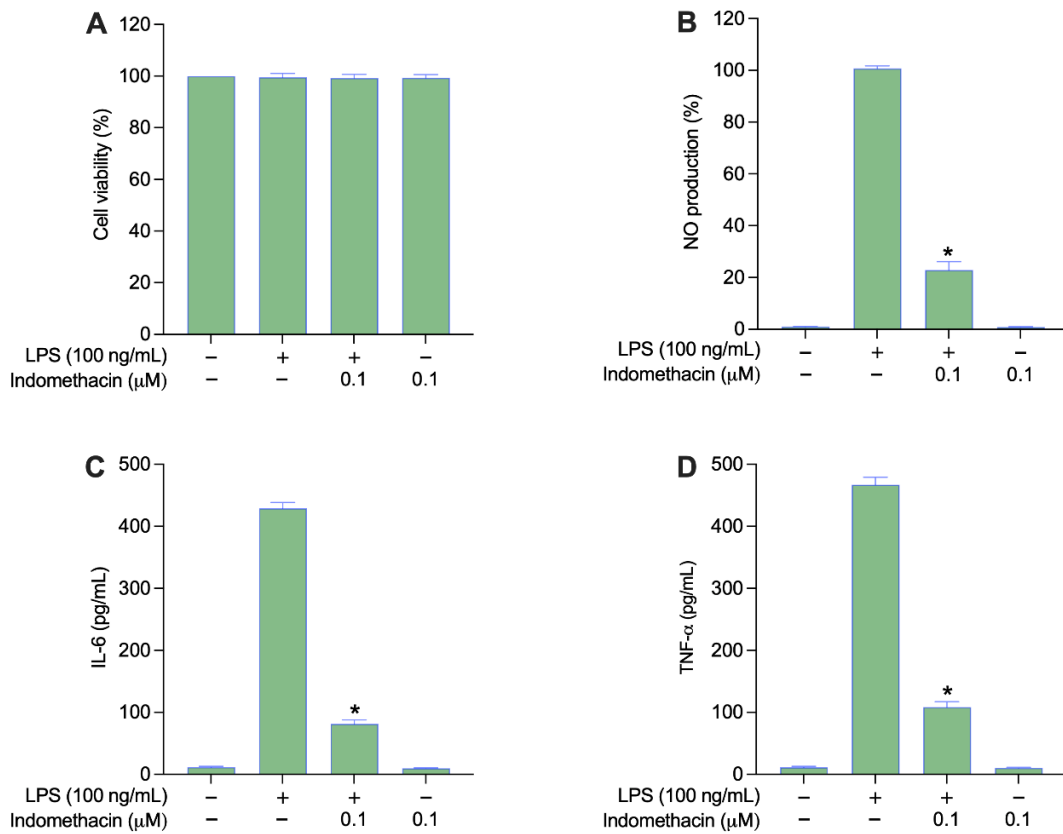

**Figure S5.** In vitro cell study of the positive control, Indomethacin, in RAW 264.7 murine macrophages. **(A)** Cytotoxic effect of indomethacin in LPS-stimulated RAW 264.7 murine macrophages. The effects of indomethacin on **(B)** NO production and the suppression of proinflammatory cytokines, including **(C)** IL-6 and **(D)** TNF- $\alpha$ , in LPS-stimulated RAW 264.7 macrophages. Indomethacin, employed as a positive control in the in vitro studies with RAW 264.7 murine macrophages, exhibited notable efficacy in reducing NO production and pro-inflammatory cytokine levels upon LPS stimulation. This affirms indomethacin as a positive control for evaluating anti-inflammatory properties, thereby validating the reliability of results. Data are presented as the mean  $\pm$  SD (n=4). \* $p < 0.05$  compared to LPS-stimulated cells without treatment.



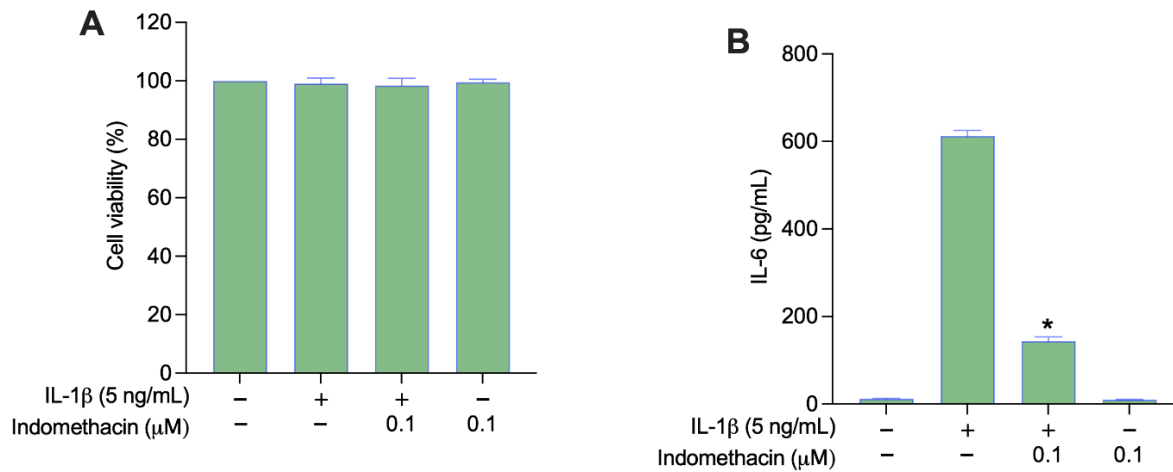

**Figure S6.** In vitro cell study of the positive control, Indomethacin, in SW 1353 human chondrocytes. **(A)** Cytotoxic effect of indomethacin in IL-1 $\beta$ -stimulated SW 1353 cells. **(B)** Effects of Indomethacin on IL-6 in IL-1 $\beta$ -stimulated SW 1353 cell lines. Indomethacin, employed as a positive control in the in vitro studies with SW 1353 cells, exhibited notable efficacy in reducing pro-inflammatory cytokine levels upon IL-1 $\beta$  stimulation. This affirms indomethacin as a positive control for evaluating anti-inflammatory properties, thereby validating the reliability of results. Data are presented as the mean  $\pm$  SD (n=4). \* $p$  < 0.05 compared to IL-1 $\beta$ -stimulated cells without treatment.

**Table S1.** Results of ANOVA for Particle size.

| Source         | Sum of Squares | df | Mean Square | F-value | p-value  |                 |
|----------------|----------------|----|-------------|---------|----------|-----------------|
| Model          | 47087.73       | 8  | 5885.97     | 601.11  | < 0.0001 | significant     |
| A-GMS          | 221.13         | 1  | 221.13      | 22.58   | 0.0032   |                 |
| B-Tween 80     | 9912.32        | 1  | 9912.32     | 1012.31 | < 0.0001 |                 |
| C-CBD          | 9220.82        | 1  | 9220.82     | 941.69  | < 0.0001 |                 |
| AB             | 7276.94        | 1  | 7276.94     | 743.17  | < 0.0001 |                 |
| BC             | 4126.14        | 1  | 4126.14     | 421.39  | < 0.0001 |                 |
| A <sup>2</sup> | 7025.77        | 1  | 7025.77     | 717.52  | < 0.0001 |                 |
| B <sup>2</sup> | 6875.19        | 1  | 6875.19     | 702.14  | < 0.0001 |                 |
| C <sup>2</sup> | 2140.75        | 1  | 2140.75     | 218.63  | < 0.0001 |                 |
| Residual       | 58.75          | 6  | 9.79        |         |          | not significant |
| Lack of Fit    | 54.69          | 4  | 13.67       | 6.74    | 0.1334   |                 |
| Pure Error     | 4.06           | 2  | 2.03        |         |          |                 |
| Cor Total      | 47146.48       | 14 |             |         |          |                 |

**Table S2.** Results of ANOVA for PDI.

| Source         | Sum of Squares | df | Mean Square | F-value | p-value  |                 |
|----------------|----------------|----|-------------|---------|----------|-----------------|
| Model          | 0.0575         | 7  | 0.0082      | 79.07   | < 0.0001 | significant     |
| A-GMS          | 0.0002         | 1  | 0.0002      | 1.58    | 0.2494   |                 |
| B-Tween 80     | 0.0005         | 1  | 0.0005      | 5.04    | 0.0596   |                 |
| C-CBD          | 0.0054         | 1  | 0.0054      | 52.43   | 0.0002   |                 |
| AB             | 0.0333         | 1  | 0.0333      | 320.76  | < 0.0001 |                 |
| A <sup>2</sup> | 0.0069         | 1  | 0.0069      | 66.45   | < 0.0001 |                 |
| B <sup>2</sup> | 0.0008         | 1  | 0.0008      | 8.17    | 0.0244   |                 |
| C <sup>2</sup> | 0.0089         | 1  | 0.0089      | 85.89   | < 0.0001 | not significant |
| Residual       | 0.0007         | 7  | 0.0001      |         |          |                 |
| Lack of Fit    | 0.0007         | 5  | 0.0001      | 9.62    | 0.0968   |                 |
| Pure Error     | 0.0000         | 2  | 0.0000      |         |          |                 |
| Cor Total      | 0.0582         | 14 |             |         |          |                 |

**Table S3.** Results of ANOVA for EE.

| Source      | Sum of Squares | df | Mean Square | F-value | p-value  |                 |
|-------------|----------------|----|-------------|---------|----------|-----------------|
| Model       | 142.18         | 3  | 47.39       | 65.97   | < 0.0001 | significant     |
| A-GMS       | 16.70          | 1  | 16.70       | 23.25   | 0.0005   |                 |
| B-Tween 80  | 48.66          | 1  | 48.66       | 67.73   | < 0.0001 |                 |
| C-CBD       | 76.82          | 1  | 76.82       | 106.92  | < 0.0001 |                 |
| Residual    | 7.90           | 11 | 0.7184      |         |          | not significant |
| Lack of Fit | 6.29           | 9  | 0.6994      | 0.8697  | 0.6408   |                 |
| Pure Error  | 1.61           | 2  | 0.8041      |         |          |                 |
| Cor Total   | 150.08         | 14 |             |         |          |                 |

**Table S4.** Results of ANOVA for DL.

| Source         | Sum of Squares | df | Mean Square | F-value  | p-value  |                 |
|----------------|----------------|----|-------------|----------|----------|-----------------|
| Model          | 3.18           | 6  | 0.5299      | 2747.41  | < 0.0001 | significant     |
| A-GMS          | 0.9385         | 1  | 0.9385      | 4866.04  | < 0.0001 |                 |
| B-Tween 80     | 0.0091         | 1  | 0.0091      | 47.25    | 0.0001   |                 |
| C-CBD          | 2.13           | 1  | 2.13        | 11055.40 | < 0.0001 |                 |
| AC             | 0.0625         | 1  | 0.0625      | 324.07   | < 0.0001 |                 |
| BC             | 0.0012         | 1  | 0.0012      | 6.35     | 0.0358   |                 |
| A <sup>2</sup> | 0.0358         | 1  | 0.0358      | 185.37   | < 0.0001 | not significant |
| Residual       | 0.0015         | 8  | 0.0002      |          |          |                 |
| Lack of Fit    | 0.0011         | 6  | 0.0002      | 0.7687   | 0.6606   |                 |
| Pure Error     | 0.0005         | 2  | 0.0002      |          |          |                 |
| Cor Total      | 3.18           | 14 |             |          |          |                 |

**Table S5.** Summary of the regression analyses of the responses.

| <b>Response</b> | <b>Suggested Model</b> | <b><i>p</i>-value, over-all model</b> | <b><i>p</i>-value, lack-of-fit</b> | <b>Adjusted R<sup>2</sup></b> | <b>Predicted R<sup>2</sup></b> | <b>Adeq precision</b> |
|-----------------|------------------------|---------------------------------------|------------------------------------|-------------------------------|--------------------------------|-----------------------|
| Particle size   | Quadratic              | < 0.0001                              | 0.1022                             | 0.9965                        | 0.9813                         | 73.8627               |
| PDI             | Quadratic              | < 0.0001                              | 0.1279                             | 0.9840                        | 0.9154                         | 30.9626               |
| EE              | Linear                 | < 0.0001                              | 0.6408                             | 0.9330                        | 0.8979                         | 25.4282               |
| DL              | Quadratic              | 0.0006                                | 0.4438                             | 0.9987                        | 0.9948                         | 181.0404              |

**Table S6.** Release kinetic modeling of CBD-SLN.

| Model                                                              | Presence of HSA | Parameter                        | R <sup>2</sup> | AIC     | MSC     |
|--------------------------------------------------------------------|-----------------|----------------------------------|----------------|---------|---------|
| Zero-order<br>( $F = k_0 \cdot t$ )                                | ☑               | $K_0 = 4.256$                    | 0.4317         | 81.19   | -0.0050 |
|                                                                    | ☒               | $K_0 = 4.832$                    | 0.4272         | 84.40   | 0.0155  |
| First-order<br>( $F = 100 \cdot e^{-k_1 t}$ )                      | ☑               | $K_1 = 0.088$                    | 0.8669         | 66.67   | 1.4468  |
|                                                                    | ☒               | $K_1 = 0.116$                    | 0.9243         | 64.16   | 2.0390  |
| Higuchi<br>( $F = k_H \cdot t^{0.5}$ )                             | ☑               | $K_H = 17.069$                   | 0.9734         | 50.57   | 3.0568  |
|                                                                    | ☒               | $K_H = 19.434$                   | 0.9586         | 58.1162 | 2.6437  |
| Korsmeyer-Peppas<br>( $F = k_{KP} \cdot t^n$ )                     | ☑               | $K_{KP} = 21.174$<br>$n = 0.410$ | 0.9943         | 37.17   | 4.3967  |
|                                                                    | ☒               | $K_{KP} = 23.793$<br>$n = 0.415$ | 0.9769         | 54.2933 | 3.0254  |
| Hixson-Crowell<br>( $F = 100 \cdot [1 - (1 - k_{HC} \cdot t)^3]$ ) | ☑               | $K_{HC} = 0.025$                 | 0.8013         | 70.68   | 1.0458  |
|                                                                    | ☒               | $K_{HC} = 0.033$                 | 0.8816         | 68.64   | 1.5916  |

**Table S7.** Release kinetic modeling of Free CBD.

| Model                                                              | Presence of HSA | Parameter                        | R <sup>2</sup> | AIC   | MSC     |
|--------------------------------------------------------------------|-----------------|----------------------------------|----------------|-------|---------|
| Zero-order<br>( $F = k_0 \cdot t$ )                                | ☑               | $K_0 = 5.313$                    | 0.3400         | 87.51 | -0.1486 |
|                                                                    | ☒               | $K_0 = 6.441$                    | -0.0347        | 95.80 | -0.6568 |
| First-order<br>( $F = 100 \cdot e^{-k_1 t}$ )                      | ☑               | $K_1 = 0.146$                    | 0.9346         | 64.39 | 2.1629  |
|                                                                    | ☒               | $K_1 = 0.314$                    | 0.9731         | 59.29 | 2.9942  |
| Higuchi<br>( $F = k_H \cdot t^{0.5}$ )                             | ☑               | $K_H = 21.506$                   | 0.9332         | 64.60 | 2.1420  |
|                                                                    | ☒               | $K_H = 26.879$                   | 0.8142         | 78.62 | 1.0603  |
| Korsmeyer-Peppas<br>( $F = k_{KP} \cdot t^n$ )                     | ☑               | $K_{KP} = 27.641$<br>$n = 0.395$ | 0.9630         | 60.71 | 2.5318  |
|                                                                    | ☒               | $K_{KP} = 40.982$<br>$n = 0.322$ | 0.9229         | 71.82 | 1.7404  |
| Hixson-Crowell<br>( $F = 100 \cdot [1 - (1 - k_{HC} \cdot t)^3]$ ) | ☑               | $K_{HC} = 0.040$                 | 0.9076         | 67.85 | 1.8178  |
|                                                                    | ☒               | $K_{HC} = 0.062$                 | 0.8964         | 72.78 | 1.6448  |
